# Supplementary material for: Chinese Herbal Medicine Combined with Intravitreal Antivascular Growth Factor Agents in Treatment of Macular Edema Secondary to Retinal Vein Occlusion: A Systematic Review and Meta-Analysis
Source: Hindawi journal article supplement (doi:10.1155/2022/4823677), 2022-12-28
Supplement: f1 [file 4823677.f1.zip]

---

## Supplementary Material S2. Search terms for each database.

---

| Databases        | Search items                                                                                                                                                                                                                                                 |
|------------------|--------------------------------------------------------------------------------------------------------------------------------------------------------------------------------------------------------------------------------------------------------------|
| Cochrane Library | #1 MeSH descriptor: [Retinal Vein Occlusion] explode all trees                                                                                                                                                                                               |
|                  | #2 (retina*):ti,ab,kw (Word variations have been searched)                                                                                                                                                                                                   |
|                  | #3 (ve?n*):ti,ab,kw OR (vessel*):ti,ab,kw OR (vascula*):ti,ab,kw (Word variations have been searched)                                                                                                                                                        |
|                  | #4 (occlu*):ti,ab,kw OR (obstruct*):ti,ab,kw OR (block*):ti,ab,kw OR (thromb*):ti,ab,kw OR (embol*):ti,ab,kw (Word variations have been searched)                                                                                                            |
|                  | #5 (clot*):ti,ab,kw (Word variations have been searched)                                                                                                                                                                                                     |
|                  | #6 #4 or #5                                                                                                                                                                                                                                                  |
|                  | #7 #2 and #3 and #6                                                                                                                                                                                                                                          |
|                  | #8 (RVO):ti,ab,kw OR (CRVO):ti,ab,kw OR (BRVO):ti,ab,kw (Word variations have been searched)                                                                                                                                                                 |
|                  | #9 #1 or #7 or #8                                                                                                                                                                                                                                            |
|                  | #10 MeSH descriptor: [Macular Edema] explode all trees                                                                                                                                                                                                       |
|                  | #11 (Cystoid Macular Edema, Postoperative):ti,ab,kw OR (Macular Edema, Cystoid):ti,ab,kw OR (Edema, Cystoid Macular):ti,ab,kw OR (Cystoid Macular Dystrophy):ti,ab,kw OR (Macular Dystrophy, Dominant Cystoid):ti,ab,kw (Word variations have been searched) |
|                  | #12 (Central Retinal Edema, Cystoid):ti,ab,kw OR (Cystoid Macular Edema):ti,ab,kw (Word variations have been searched)                                                                                                                                       |
|                  | #13 #11 or #12                                                                                                                                                                                                                                               |
|                  | #14 #10 or #13                                                                                                                                                                                                                                               |
|                  | #15 MeSH descriptor: [Drugs, Chinese Herbal] explode all trees                                                                                                                                                                                               |
|                  | #16 (TCM):ti,ab,kw OR (Chinese medicine):ti,ab,kw OR (Chinese traditional):ti,ab,kw (Word variations have been searched)                                                                                                                                     |
|                  | #17 (herb*):ti,ab,kw OR (alternative medicine):ti,ab,kw OR (Chinese patent medicine):ti,ab,kw OR (decoction):ti,ab,kw OR (prescription):ti,ab,kw (Word variations have been searched)                                                                        |
|                  | #18 #16 or #17                                                                                                                                                                                                                                               |
|                  | #19 #15 or #18                                                                                                                                                                                                                                               |
|                  | #20 #9 and #14 and #19                                                                                                                                                                                                                                       |

---

|        |                                                                                                                                                                                                                                                                                                                                                                                                                                                                                                                                                                                                                                                                                                                                                                                                                                                                                                                                                                                                                                                                                                                    |
|--------|--------------------------------------------------------------------------------------------------------------------------------------------------------------------------------------------------------------------------------------------------------------------------------------------------------------------------------------------------------------------------------------------------------------------------------------------------------------------------------------------------------------------------------------------------------------------------------------------------------------------------------------------------------------------------------------------------------------------------------------------------------------------------------------------------------------------------------------------------------------------------------------------------------------------------------------------------------------------------------------------------------------------------------------------------------------------------------------------------------------------|
| Pubmed | <p>#1 "Retinal Vein Occlusion"[Mesh]<br/> #2 "retina*"[Tiab]<br/> #3 "ve?n*"[Tiab] OR "vessel*"[Tiab] OR "vascula*"[Tiab]<br/> #4 "occlu*"[Tiab] OR "obstruct*"[Tiab] OR "block*"[Tiab] OR "thromb*"[Tiab] OR "embol*"[Tiab] OR "clot*"[Tiab]<br/> #5 #2 AND #3 AND #4<br/> #6 "RVO"[Tiab] OR "BRVO"[Tiab] OR "CRVO"[Tiab]<br/> #7 #1 OR #5 OR #6<br/> #8 "Macular Edema"[Mesh]<br/> #9 "edema macular"[Tiab] OR "cystoid macular edema postoperative"[Tiab] OR "macular edema cystoid"[Tiab] OR "edema cystoid macular"[Tiab] OR "cystoid macular dystrophy"[Tiab]<br/> #10 #8 OR #9<br/> #11 "drugs, chinese herbal"[Mesh]<br/> #12 "TCM"[Tiab] OR "chinese medicine"[Tiab] OR "chinese traditional"[Tiab] OR "herb*"[Tiab] "alternative medicine"[Tiab] OR "chinese patent medicine"[Tiab] OR "decoction"[Tiab] OR "prescription"[Tiab]<br/> #13 #11 OR #12<br/> #14 "randomized controlled trial" [pt] OR "controlled clinical trial" [pt] OR "randomized" [tiab] OR "placebo" [tiab] OR "drug therapy" [sh] OR "randomly" [tiab] OR "trial" [tiab] OR "groups" [tiab]<br/> #15 #7 AND #10 AND #13 AND #14</p> |
| EMBASE | <p>#1 'retina vein occlusion'/exp<br/> #2 retina*:ti,ab,kw AND (ve?n*:ti,ab,kw OR vessel*:ti,ab,kw OR vascula*:ti,ab,kw) AND (occlu*:ti,ab,kw OR obstruct*:ti,ab,kw OR block*:ti,ab,kw OR thromb*:ti,ab,kw OR embol*:ti,ab,kw OR clot*:ti,ab,kw)<br/> #3 rvo:ti,ab,kw OR brvo:ti,ab,kw OR crvo:ti,ab,kw<br/> #4 #1 OR #2 OR #3<br/> #5 'macular edema'/exp<br/> #6 'cystoid macular edema, postoperative':ti,ab,kw OR 'macular edema, cystoid':ti,ab,kw OR 'edema, cystoid macular':ti,ab,kw OR 'cystoid macular dystrophy':ti,ab,kw OR 'macular dystrophy, dominant cystoid':ti,ab,kw OR 'central retinal edema, cystoid':ti,ab,kw OR</p>                                                                                                                                                                                                                                                                                                                                                                                                                                                                         |

|                 |                                                                                                                                                                                                                                                                                                                                                                                                                                                                                                                                                                                                                                                                                                                                                                                                 |
|-----------------|-------------------------------------------------------------------------------------------------------------------------------------------------------------------------------------------------------------------------------------------------------------------------------------------------------------------------------------------------------------------------------------------------------------------------------------------------------------------------------------------------------------------------------------------------------------------------------------------------------------------------------------------------------------------------------------------------------------------------------------------------------------------------------------------------|
|                 | <p>'cystoid macular edema':ti,ab,kw<br/> #7 #5 OR #6<br/> #8 'chinese drug'/exp<br/> #9 tcm:ti,ab,kw OR 'chinese medicine':ti,ab,kw OR 'chinese traditional':ti,ab,kw OR herb*:ti,ab,kw OR 'alternative medicine':ti,ab,kw<br/> OR 'chinese patent medicine':ti,ab,kw OR decoction:ti,ab,kw OR prescription:ti,ab,kw<br/> #10 #8 OR #9<br/> #11 'crossover procedure':de OR 'double-blind procedure':de OR 'randomized controlled trial':de OR 'single-blind procedure':de OR<br/> random*:de,ab,ti OR factorial*:de,ab,ti OR crossover*:de,ab,ti OR ((cross NEXT/1 over*):de,ab,ti) OR placebo*:de,ab,ti OR ((doubl*<br/> NEAR/1 blind*):de,ab,ti) OR ((singl* NEAR/1 blind*):de,ab,ti) OR assign*:de,ab,ti OR allocat*:de,ab,ti OR volunteer*:de,ab,ti<br/> #12 #4 AND #7 AND #10 AND #11</p> |
| CNKI            | <p>主题=(视网膜静脉阻塞 + 视网膜中央静脉阻塞 + 视网膜分支静脉阻塞) AND (主题=黄斑水肿) AND (主题=中药 + 中医 + 中西医<br/> + 成药 + 草药 + 注射剂 + 汤 + 方 + 片 + 丸) AND (主题=抗 VEGF + 雷珠单抗 + 康柏西普 + 阿柏西普 + 贝伐单抗)</p>                                                                                                                                                                                                                                                                                                                                                                                                                                                                                                                                                                                                                               |
| Sinomed         | <p>( "视网膜静脉阻塞"[常用字段:智能] OR "视网膜中央静脉阻塞"[常用字段:智能] OR "视网膜分支静脉阻塞"[常用字段:智能])<br/> AND "黄斑水肿"[常用字段:智能] AND ( "中药"[常用字段:智能] OR "中医"[常用字段:智能] OR "中西医"[常用字段:智能] OR "成<br/> 药"[常用字段:智能] OR "草药"[常用字段:智能] OR "注射剂"[常用字段:智能] OR "汤"[常用字段:智能] OR "方"[常用字段:智能]<br/> OR "片"[常用字段:智能] OR "丸" [常用字段:智能]) AND ( "抗 VEGF"[常用字段:智能] OR "雷珠单抗"[常用字段:智能] OR "康柏<br/> 西普"[常用字段:智能] OR "阿柏西普"[常用字段:智能] OR "贝伐单抗")</p>                                                                                                                                                                                                                                                                                                                                                                                                 |
| VIP             | <p>(M=(视网膜静脉阻塞 OR 视网膜中央静脉阻塞 OR 视网膜分支静脉阻塞)AND M=(黄斑水肿)) AND (M=(中药 OR 中医 OR 中西<br/> 医 OR 成药 OR 草药 OR 注射剂 OR 汤 OR 方 OR 片 OR 丸) OR R=(中药 OR 中医 OR 中西医 OR 成药 OR 草药 OR 注射剂 OR<br/> 汤 OR 方 OR 片 OR 丸)) AND (M=(抗 VEGF OR 雷珠单抗 OR 康柏西普 OR 阿柏西普 OR 贝伐单抗) OR R=(抗 VEGF OR 雷珠单<br/> 抗 OR 康柏西普 OR 阿柏西普 OR 贝伐单抗))</p>                                                                                                                                                                                                                                                                                                                                                                                                                                                                                       |
| Wanfang<br>Data | <p>主题:( 视网膜静脉阻塞 OR 视网膜中央静脉阻塞 OR 视网膜分支静脉阻塞) AND 主题:( “黄斑水肿”) AND 主题:(中药 OR 中医<br/> OR 中西医 OR 成药 OR 草药 OR 注射剂 OR 汤 OR 方 OR 片 OR 丸) AND 主题:(抗 VEGF OR 雷珠单抗 OR 康柏西普 OR 阿柏西<br/> 普 OR 贝伐单抗)</p>                                                                                                                                                                                                                                                                                                                                                                                                                                                                                                                                                                                                      |
