# Supplementary material for: Chinese Herbal Medicine Combined with Intravitreal Antivascular Growth Factor Agents in Treatment of Macular Edema Secondary to Retinal Vein Occlusion: A Systematic Review and Meta-Analysis
Source: Hindawi journal article supplement (doi:10.1155/2022/4823677), 2022-12-28
Supplement: f1 [file 4823677.f1.zip]

#### Supplementary Material S4. Components of Chinese herbal formulas used in the included trials.

| Study             | Chinese herbal medicine | Components                                                                                                                                                                                                                                                                                                                                                                                                                                                                                                                                                                                                                                                                                                                                                                                                                                                                                                                                                                                                                                                                                                                                                                                                                                                                      | Dosage formulation |
|-------------------|-------------------------|---------------------------------------------------------------------------------------------------------------------------------------------------------------------------------------------------------------------------------------------------------------------------------------------------------------------------------------------------------------------------------------------------------------------------------------------------------------------------------------------------------------------------------------------------------------------------------------------------------------------------------------------------------------------------------------------------------------------------------------------------------------------------------------------------------------------------------------------------------------------------------------------------------------------------------------------------------------------------------------------------------------------------------------------------------------------------------------------------------------------------------------------------------------------------------------------------------------------------------------------------------------------------------|--------------------|
| Su. et al. 2021   | Hexuemingmu Tablet      | Cattail pollen (Puhuang, <i>Typha angustifolia</i> L.), Salvia Root (Danshen, <i>Radix Salviae Miltiorrhizae</i> ), <i>Radix Rehmanniae</i> (Dihuang, <i>Rehmannia glutinosa</i> (Gaert.) Libosch.), <i>Herba Ecliptae</i> (Mohanlian, <i>Herba Ecliptae Eclipta prostrata</i> L.), <i>Chrysanthemum</i> (Juhua, <i>Dendranthema morifolium</i> (Ramat.) Tzvel.), Baical Skullcap Root (Huangqin, <i>Radix Scutellariae Baicalensis</i> ), Cassia Seed (Juemingzi, <i>Cassia tora</i> Linn), Plantain Seed (Cheqianzi, <i>Semen Plantaginis</i> ), Motherwort Fruit (Chongweizi, <i>Leonurus japonicus</i> Houtt.), Glossy Privet Fruit (Nvzhenzi, <i>Fructus Ligustri Lucidi</i> ), <i>Prunellae Spica</i> (Xiakucao, <i>Prunella vulgaris</i> Linn.), <i>radix gentianae</i> (Longdan, <i>Gentiana scabra</i> Bunge), <i>Radix curcumae</i> (Yujin, <i>Curcuma aromatica</i> Salisb.), Scouring Rush (Muzei, <i>Equisetum hyemale</i> Linn.), Red Peony Root (Chishao, <i>Paeonia veitchii</i> Lynch), Tree Peony Bark (Mudanpi, <i>Paeonia suffruticosa</i> Andr. ), Hawthorn Fruit (Shanzha, <i>Crataegus pinnatifida</i> Bge.), Chinese Angelica Root (Danggui, <i>Radix Angelicae Sinensis</i> ), Szechuan Lovage Root (Chuanxiong, <i>Rhizoma Ligustici Chuanxiong</i> ) | Tablet             |
| Wang. et al. 2020 | Huayu Lishui Decoction  | Peach kernel (Taoren, <i>Prunus persica</i> (L.)Batsch), Safflower Flower (Honghua, <i>Flos Carthami Tinctorii</i> ), Poria (Fuling, <i>Scierotium Poriae Cocos</i> ), Red Peony Root (Chishao, <i>Paeonia veitchii</i> Lynch), Szechuan Lovage Root (Chuanxiong, <i>Rhizoma Ligustici Chuanxiong</i> ), Cassia twig (Guizhi, <i>Ramulus Cinnamomi Cassiae</i> ), <i>Radix Rehmanniae</i> (Dihuang, <i>Rehmannia glutinosa</i> (Gaert.) Libosch.), Chinese Angelica Root (Danggui, <i>Radix Angelicae Sinensis</i> ), Root of the Balloon Flower (Jiegeng, <i>Platycodi Radix</i> ), Bittet Orange (Zhiqiao, <i>Fructus Aurantii</i> ), White <i>Atractylodes</i> Rhizome (Baizhu, <i>Rhizoma Atractylodis Macrocephalae</i> ), <i>Radix Glycyrrhizae Preparata</i> (Zhigancao, <i>Glycyrrhiza uralensis</i> Fisch.)                                                                                                                                                                                                                                                                                                                                                                                                                                                            | Decoction          |
| Hao. 2019         | Quji Tongluo Decoction  | Peach kernel (Taoren, <i>Prunus persica</i> (L.)Batsch) 10g, Safflower Flower (Honghua, <i>Flos Carthami Tinctorii</i> )5g, <i>Radix Rehmanniae</i> (Dihuang, <i>Rehmannia glutinosa</i> (Gaert.) Libosch.) 20g, Chinese Angelica Root (Danggui, <i>Radix Angelicae Sinensis</i> ) 10g, Membrane of Chicken Gizzard (Jineijin, <i>Endothelium Corneum Gigeriae galli</i> ) 10g, <i>Rhizoma Pinelliae Praeparatum</i> (Fabanxia, <i>Arisaema erubescens</i> (Wall.) Schott) 10g, Tangerine Peel (Chenpi, <i>Pericarpium Citri Reticulatae</i> ) 8g, Poria (Fuling, <i>Scierotium Poriae Cocos</i> ) 15g, Sanchi (sanqi, <i>Panax notoginseng</i> ) 3g, <i>Ledebouriella</i> Root (Fangfeng, <i>Radix Ledebouriellae Divaricatae</i> ) 5g.                                                                                                                                                                                                                                                                                                                                                                                                                                                                                                                                        | Decoction          |

|                       |                                         |                                                                                                                                                                                                                                                                                                                                                                                                                                                                                                                                                                                                                                                                                                                                                                                                                                                                                                                                                  |           |
|-----------------------|-----------------------------------------|--------------------------------------------------------------------------------------------------------------------------------------------------------------------------------------------------------------------------------------------------------------------------------------------------------------------------------------------------------------------------------------------------------------------------------------------------------------------------------------------------------------------------------------------------------------------------------------------------------------------------------------------------------------------------------------------------------------------------------------------------------------------------------------------------------------------------------------------------------------------------------------------------------------------------------------------------|-----------|
| Wei. et al.<br>2020   | Xuefu Zhuyu Decoction                   | Peach kernel (Taoren, <i>Prunus persica</i> (L.)Batsch) 12g, Safflower Flower (Honghua, <i>Flos Carthami Tinctorii</i> ) 9g, Chinese Angelica Root (Danggui, <i>Radix Angelicae Sinensis</i> )9 g, <i>Radix Rehmanniae</i> (Dihuang, <i>Rehmannia glutinosa</i> (Gaert.) Libosch.) 9g, Root of bidentate achyranthes (Niuxi, <i>Achyranthes bidentata</i> Blume) 9g, Szechuan Lovage Root (Chuanxiong, <i>Rhizoma Ligustici Chuanxiong</i> ) 6g, Root of the Balloon Flower (Jiegeng, <i>Platycodi Radix</i> ) 6g, Red Peony Root (Chishao, <i>Paeonia veitchii</i> Lynch) 6g, Bittet Orange (Zhiqiao, <i>Fructus Aurantii</i> ) 6g, <i>Radix Glycyrrhizae Preparata</i> (Zhigancao, <i>Glycyrrhiza uralensis</i> Fisch.) 6g, Thorowax Root (Chaihu, <i>Radix Bupleuri</i> ) 6g, <i>Alisma</i> (Zexie, <i>Rhizoma Alismatis</i> ) 8g.                                                                                                            | Decoction |
| Sha and Duan.<br>2018 | CHM                                     | Peach kernel (Taoren, <i>Prunus persica</i> (L.)Batsch) 12g, Safflower Flower (Honghua, <i>Flos Carthami Tinctorii</i> ) 12g, <i>Salvia</i> Root (Danshen, <i>Radix Salviae Miltiorrhizae</i> ) 12g, Szechuan Lovage Root (Chuanxiong, <i>Rhizoma Ligustici Chuanxiong</i> ) 12g, Chinese Angelica Root (Danggui, <i>Radix Angelicae Sinensis</i> )12g, <i>Radix Rehmanniae</i> (Dihuang, <i>Rehmannia glutinosa</i> (Gaert.) Libosch.)12g, Thorowax Root (Chaihu, <i>Radix Bupleuri</i> ) 12g, Red Peony Root (Chishao, <i>Paeonia veitchii</i> Lynch)12g, Root of Pilose Asiabell (Dangshen, <i>Codonopsis pilosula</i> (Franch.) Nannf.) 20g, Poria (Fuling, <i>Scierotium Poriae Cocos</i> ) 15g, White <i>Atractylodes Rhizome</i> (Baizhu, <i>Rhizoma Atractylodis Macrocephalae</i> ) 15g, <i>Alisma</i> (Zexie, <i>Rhizoma Alismatis</i> ) 12g, <i>Radix Glycyrrhizae Preparata</i> (Zhigancao, <i>Glycyrrhiza uralensis</i> Fisch.) 6g. | Decoction |
| Wu. et al. 2020       | Taohong Siwu Decoction                  | Safflower Flower (Honghua, <i>Flos Carthami Tinctorii</i> ), Chinese Angelica Root (Danggui, <i>Radix Angelicae Sinensis</i> ), White Peony Root (Baishaoyao, <i>Radix Albus Paeoniae Lactiflorae</i> ), Szechuan Lovage Root (Chuanxiong, <i>Rhizoma Ligustici Chuanxiong</i> ), <i>Radix Rehmanniae</i> (Dihuang, <i>Rehmannia glutinosa</i> (Gaert.) Libosch.), <i>Alisma</i> (Zexie, <i>Rhizoma Alismatis</i> ), Poria (Fuling, <i>Scierotium Poriae Cocos</i> ), Coix seed (Yiyiren, <i>Semen Coicis</i> ), <i>Pseudostellaria Root</i> (Taizishen, <i>Pseudostellariae Radix</i> )                                                                                                                                                                                                                                                                                                                                                         | Decoction |
| Tao. et al.<br>2017   | Taohong Siwu Decoctionand Siling Powder | <i>Salvia</i> Root (Danshen, <i>Radix Salviae Miltiorrhizae</i> ) 30g, Sanchi (Sanqi, <i>Panax notoginseng</i> )10g, Chinese Angelica Root (Danggui, <i>Radix Angelicae Sinensis</i> )15g, Szechuan Lovage Root (Chuanxiong, <i>Rhizoma Ligustici Chuanxiong</i> )10g, Red Peony Root (Chishao, <i>Paeonia veitchii</i> Lynch)15g, <i>Radix Rehmanniae</i> (Dihuang, <i>Rehmannia glutinosa</i> (Gaert.) Libosch.)15g, Poria (Fuling, <i>Scierotium Poriae Cocos</i> ) 30g, Polyporus Sclerotium (Zhuling, <i>Sclerotium Polypori Umbellati</i> ) 15g, <i>Alisma</i> (Zexie, <i>Rhizoma Alismatis</i> ) 30g, White <i>Atractylodes Rhizome</i> (Baizhu, <i>Rhizoma Atractylodis Macrocephalae</i> ) 15g, Cassia twig (Guizhi, <i>Ramulus Cinnamomi Cassiae</i> ) 10g, Plantain Seed (Cheqianzi, <i>Semen Plantaginis</i> ) 30g, Motherwort Fruit (Chongweizi, <i>Leonurus japonicus</i> Houtt.) 20g                                              | Decoction |

---

|                 |                                         |                                                                                                                                                                                                                                                                                                                                                                                                                                                                                                                                                                                                                                                                                                                                        |           |
|-----------------|-----------------------------------------|----------------------------------------------------------------------------------------------------------------------------------------------------------------------------------------------------------------------------------------------------------------------------------------------------------------------------------------------------------------------------------------------------------------------------------------------------------------------------------------------------------------------------------------------------------------------------------------------------------------------------------------------------------------------------------------------------------------------------------------|-----------|
| Yan. 2017       | Jiawei Siwu Decoction and Wuling Powder | Peach kernel (Taoren, <i>Prunus persica</i> (L.)Batsch) 10g, Safflower Flower (Honghua, <i>Flos Carthami Tinctorii</i> ) 10g, Chinese Angelica Root (Danggui, <i>Radix Angelicae Sinensis</i> ) 12g, <i>Radix Rehmanniae</i> (Dihuang, <i>Rehmannia glutinosa</i> (Gaert.) Libosch.) 12g, Poria (Fuling, <i>Scierotium Poriae Cocos</i> ) 20g, White <i>Atractylodes Rhizome</i> (Baizhu, <i>Rhizoma Atractylodis Macrocephalae</i> ) 15g, <i>Polyporus Sclerotium</i> (Zhuling, <i>Sclerotium Polypori Umbellati</i> ) 15g, <i>Alisma</i> (Zexie, <i>Rhizoma Alismatis</i> ), Plantain Seed (Cheqianzi, <i>Semen Plantaginis</i> ) 15g, <i>Radix Glycyrrhizae Preparata</i> (Zhigancao, <i>Glycyrrhiza uralensis</i> Fisch.) 5g.      | Decoction |
| Ming. 2019      | Quji Tongluo Decoction                  | Peach kernel (Taoren, <i>Prunus persica</i> (L.)Batsch) 10g, Safflower Flower (Honghua, <i>Flos Carthami Tinctorii</i> ) 5g, <i>Radix Rehmanniae</i> (Dihuang, <i>Rehmannia glutinosa</i> (Gaert.) Libosch.)20g, Chinese Angelica Root (Danggui, <i>Radix Angelicae Sinensis</i> )10g, Membrane of Chicken Gizzard (jineijin, <i>Endothelium Corneum Gigeriae galli</i> )10g, <i>Rhizoma Pinelliae Praeparatum</i> (Fabanxia, <i>Arisaema erubescens</i> (Wall.) Schott) 10g, Tangerine Peel (Chenpi, <i>Pericarpium Citri Reticulatae</i> ) 8g, Poria (Fuling, <i>Scierotium Poriae Cocos</i> ) 15g, Sanchi (Sanqi, <i>Panax notoginseng</i> ) 3g, <i>Ledebouriella Root</i> (Fangfeng, <i>Radix Ledebouriellae Divaricatae</i> ) 5g. | Decoction |
| Lu. et al. 2018 | Lingqi Huangban Granule                 | Chinese Angelica Root (Danggui, <i>Radix Angelicae Sinensis</i> ) 10g, Szechuan Lovage Root (Chuanxiong, <i>Rhizoma Ligustici Chuanxiong</i> ) 10g, <i>Semen Cuscuta</i> (Tusizi, <i>Cuscuta chinensis</i> Lam.) 10g, <i>Lucid Ganoderma</i> (Lingzhi, <i>Ganoderma</i> )10g, <i>Rhizoma Atractylodis</i> (Cangzhu, <i>Atractylodis Rhizoma</i> ) 10g, <i>Salvia Root</i> (Danshen, <i>Radix Salviae Miltiorrhizae</i> ) 10g, Root of Pilose Asiabell (Dangshen, <i>Codonopsis pilosula</i> (Franch.) Nannf.) 10g, Seaweed (Haizao, <i>Sargassum</i> ) 10g, Desertliving Cistanche Herb (Roucongrong, <i>Cistanches Herba</i> )10g, Babury Wolfberry Fruit (Gouqizi, <i>Lycii Fructus</i> ) 10g.                                       | Granule   |

---
