# Supplementary material for: Chinese Herbal Medicine Combined with Intravitreal Antivascular Growth Factor Agents in Treatment of Macular Edema Secondary to Retinal Vein Occlusion: A Systematic Review and Meta-Analysis
Source: Hindawi journal article supplement (doi:10.1155/2022/4823677), 2022-12-28
Supplement: f1 [file 4823677.f1.zip]

**Supplementary Material S6. Forest plot of subgroup analysis.**

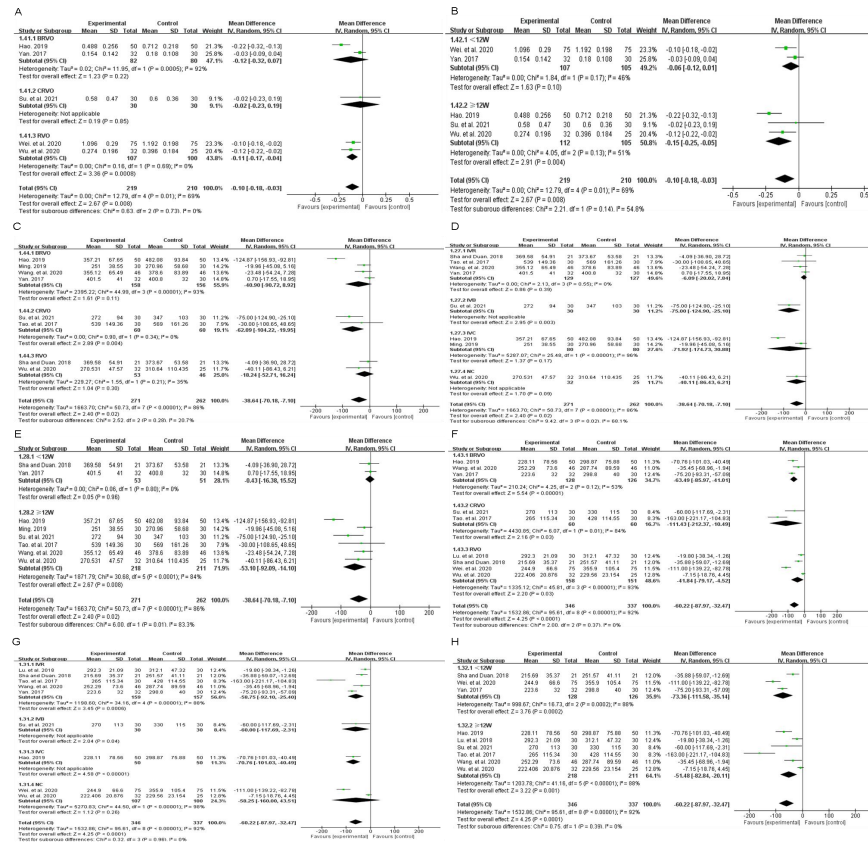

(A) BCVA at 6 months (RVO subtype). (B) BCVA at 6 months (Course of treatment). (C) CMT at 1 month (RVO subtype). (D) CMT at 1 month (Types of anti-VEGF agents). (E) CMT at 1 month (Course of treatment). (F) CMT at 6 months (RVO subtype). (G) CMT at 6 months (Types of anti-VEGF agents). (H) CMT at 6 months (Course of treatment).
