# Supplementary material for: Chinese Herbal Medicine Combined with Intravitreal Antivascular Growth Factor Agents in Treatment of Macular Edema Secondary to Retinal Vein Occlusion: A Systematic Review and Meta-Analysis
Source: Hindawi journal article supplement (doi:10.1155/2022/4823677), 2022-12-28
Supplement: f1 [file 4823677.f1.zip]

---

**Supplementary Material S5. Table of subgroup analysis.**


---

| Outcomes         | Subgroup                  | Trial (n) | Sample size (n) | Statistical method | Effect estimate (95% CI) | <i>p</i> | I <sup>2</sup> |
|------------------|---------------------------|-----------|-----------------|--------------------|--------------------------|----------|----------------|
| BCVA at 6 months | RVO subtype               |           |                 |                    |                          |          |                |
|                  | BRVO                      | 2         | 162             | MD, Random         | -0.12 [-0.32, 0.07]      | 0.22     | 92%            |
|                  | CRVO                      | 1         | 60              | MD, Random         | -0.02 [-0.23, 0.19]      | 0.85     | /              |
|                  | RVO                       | 2         | 207             | MD, Random         | -0.11 [-0.17, -0.04]     | 0.0008   | 0%             |
|                  | Course of treatment       |           |                 |                    |                          |          |                |
|                  | < 12W                     | 2         | 212             | MD, Random         | -0.06 [-0.12, 0.01]      | 0.1      | 46%            |
| CMT at 1 month   | ≥ 12W                     | 3         | 217             | MD, Random         | -0.15 [-0.25, -0.05]     | 0.004    | 51%            |
|                  | RVO subtype               |           |                 |                    |                          |          |                |
|                  | BRVO                      | 4         | 314             | MD, Random         | -40.90 [-90.72, 8.92]    | 0.11     | 93%            |
|                  | CRVO                      | 2         | 120             | MD, Random         | -62.09 [-104.22, -19.95] | 0.004    | 0%             |
|                  | RVO                       | 2         | 99              | MD, Random         | -18.24 [-52.71, 16.24]   | 0.3      | 35%            |
|                  | Types of anti-VEGF agents |           |                 |                    |                          |          |                |
|                  | ranibizumab               | 4         | 256             | MD, Random         | -6.09 [-20.02, 7.84]     | 0.39     | 0%             |
|                  | bevacizumab               | 1         | 60              | MD, Random         | -75.00 [-124.90, -25.10] | 0.003    | /              |
|                  | conbercept                | 2         | 160             | MD, Random         | -71.92 [-174.73, 30.88]  | 0.17     | 96%            |
|                  | Not clear                 | 1         | 57              | MD, Random         | -40.11 [-86.43, 6.21]    | 0.09     | /              |
|                  | Course of treatment       |           |                 |                    |                          |          |                |
|                  | < 12W                     | 2         | 104             | MD, Random         | -0.43 [-16.38, 15.52]    | 0.96     | 0              |
|                  | ≥ 12W                     | 6         | 369             | MD, Random         | -53.10 [-92.09, -14.10]  | 0.008    | 84%            |

|                 |                           |   |     |            |                           |          |     |
|-----------------|---------------------------|---|-----|------------|---------------------------|----------|-----|
| CMT at 6 months | RVO subtype               |   |     |            |                           |          |     |
|                 | BRVO                      | 3 | 254 | MD, Random | -63.49 [-85.97, -41.01]   | < 0.0001 | 53% |
|                 | CRVO                      | 2 | 120 | MD, Random | -111.43 [-212.37, -10.49] | 0.03     | 84% |
|                 | RVO                       | 4 | 309 | MD, Random | -41.84 [-79.17, -4.52]    | 0.03     | 93% |
|                 | Types of anti-VEGF agents |   |     |            |                           |          |     |
|                 | ranibizumab               | 5 | 316 | MD, Random | -58.75 [-92.10, -25.40]   | 0.0006   | 88% |
|                 | bevacizumab               | 1 | 60  | MD, Random | -60.00 [-117.69, -2.31]   | 0.04     | /   |
|                 | conbercept                | 1 | 100 | MD, Random | -70.76 [-101.03, -40.49]  | < 0.0001 | /   |
|                 | Not clear                 | 2 | 207 | MD, Random | -58.25 [-160.00, 43.51]   | 0.26     | 98% |
|                 | Course of treatment       |   |     |            |                           |          |     |
|                 | < 12W                     | 3 | 254 | MD, Random | -73.36 [-111.58, -35.14]  | 0.0002   | 88% |
|                 | ≥12W                      | 6 | 429 | MD, Random | -51.48 [-82.84, -20.11]   | 0.001    | 88% |
