# Supplementary material for: Chinese Herbal Medicine Combined with Intravitreal Antivascular Growth Factor Agents in Treatment of Macular Edema Secondary to Retinal Vein Occlusion: A Systematic Review and Meta-Analysis
Source: Hindawi journal article supplement (doi:10.1155/2022/4823677), 2022-12-28
Supplement: f1 [file 4823677.f1.zip]

Supplementary Material S8. Sensitivity analysis.

A

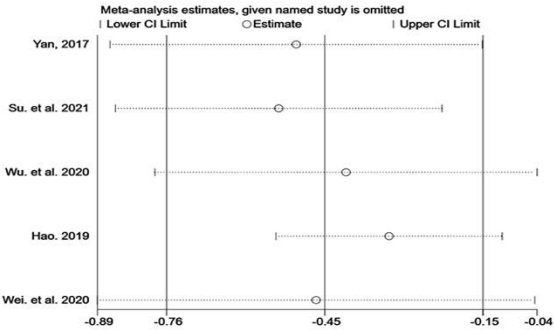

B

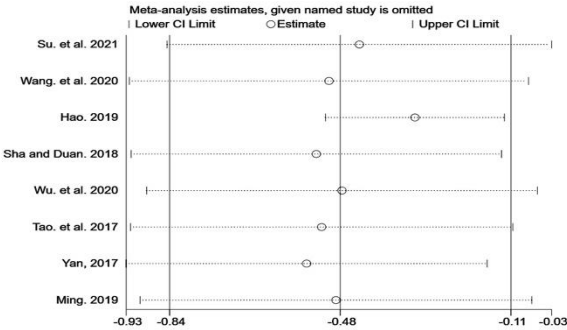

C

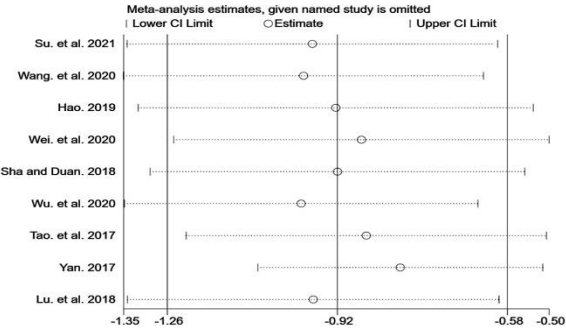

(A) BCVA at 6 months. (B) CMT at 1 month. (C) CMT at 6 months.
