# Supplementary material for: Chinese Herbal Medicine Combined with Intravitreal Antivascular Growth Factor Agents in Treatment of Macular Edema Secondary to Retinal Vein Occlusion: A Systematic Review and Meta-Analysis
Source: Hindawi journal article supplement (doi:10.1155/2022/4823677), 2022-12-28
Supplement: f1 [file 4823677.f1.zip]

---

**Supplementary Material S7. Characteristics of adverse events for included studies.**

---

| Study ID   | Intervention    |           | Course of treatment<br>(weeks) | Adverse Effects                            |                                         |
|------------|-----------------|-----------|--------------------------------|--------------------------------------------|-----------------------------------------|
|            | T               | C         |                                | T                                          | C                                       |
| Hao, 2019  | IVC + CHM       | IVC       | 24                             | NR                                         | NR                                      |
| Wu, 2020   | anti-VEGF + CHM | anti-VEGF | 12                             | One case of increased intraocular pressure | NR                                      |
| Tao, 2017  | IVR +CHM        | IVR       | 12                             | NR                                         | NR                                      |
| Yan, 2017  | IVR +CHM        | IVR       | 4                              | Three cases of subconjunctival hemorrhage  | Two cases of subconjunctival hemorrhage |
| Ming, 2019 | IVC +CHM        | IVC       | 12                             | One case of subconjunctival hemorrhage     | NR                                      |

---

T, treatment; C, control; NR: Not Reported.
