# Supplementary figures and images for: Chinese Herbal Medicine Combined with Intravitreal Antivascular Growth Factor Agents in Treatment of Macular Edema Secondary to Retinal Vein Occlusion: A Systematic Review and Meta-Analysis
Source: Hindawi journal article supplement (doi:10.1155/2022/4823677), 2022-12-28

# Supplementary Material S9. Forest plot of CMT at 1 month (after removing Hao's study)

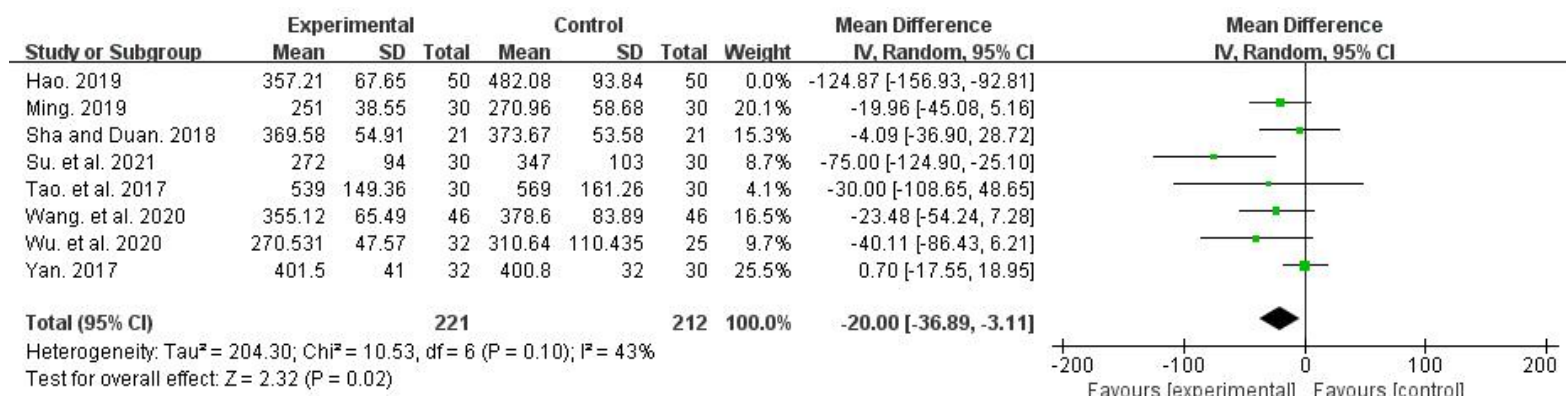

Supplement: f1 [file 4823677.f1.zip]
